# Supplementary figures and images for: Quasispecies diversity determines pathogenesis through cooperative interactions in a viral population
Source: Springer Nature journal article supplement (doi:10.1038/nature04388), 2005-12-04

**a**

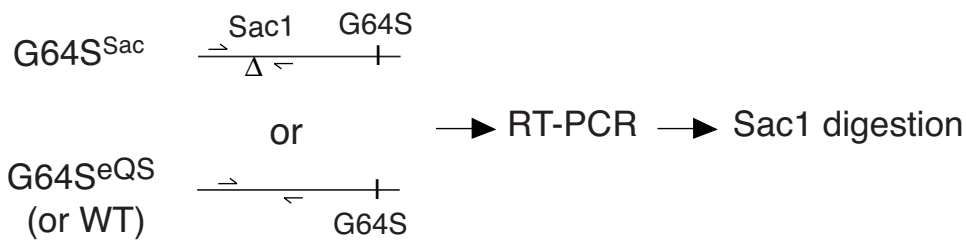

**b**

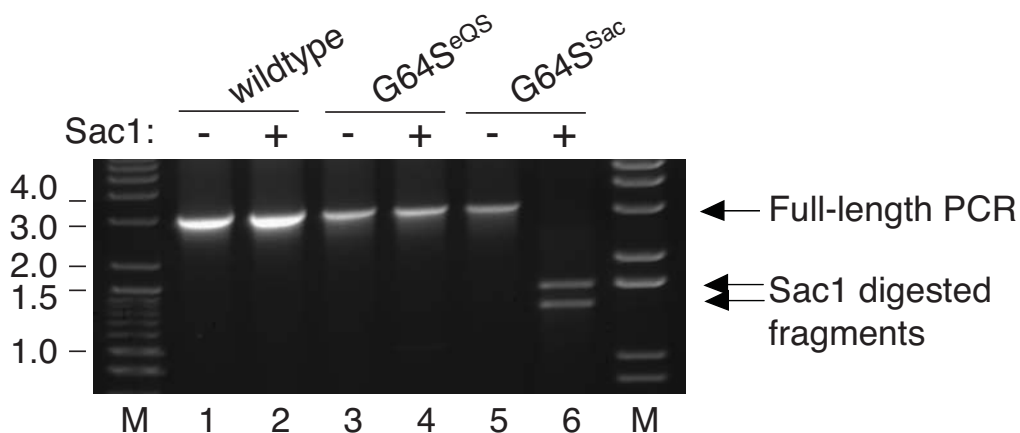

**c**

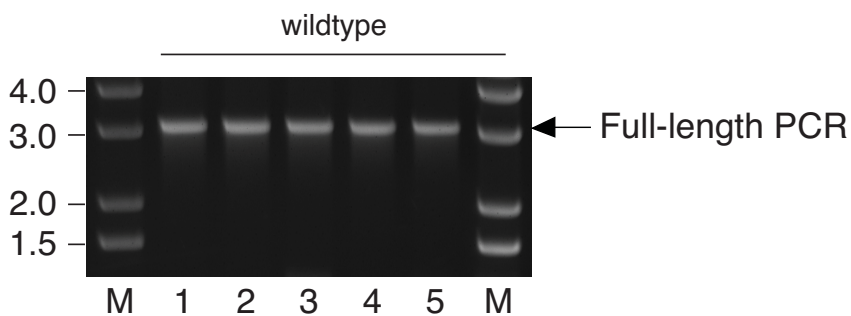

Supplement: 41586_2006_BFnature04388_MOESM10_ESM.pdf [file 41586_2006_BFnature04388_MOESM10_ESM.pdf]

a

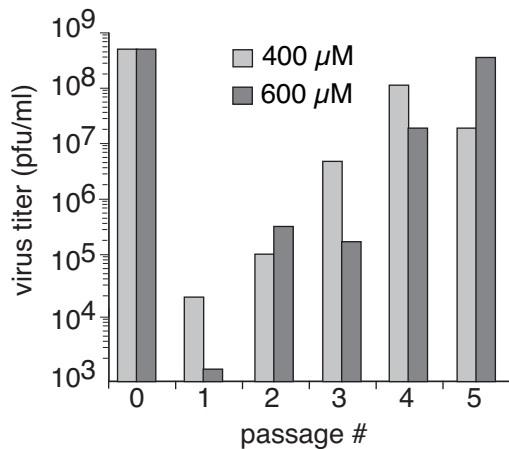

b

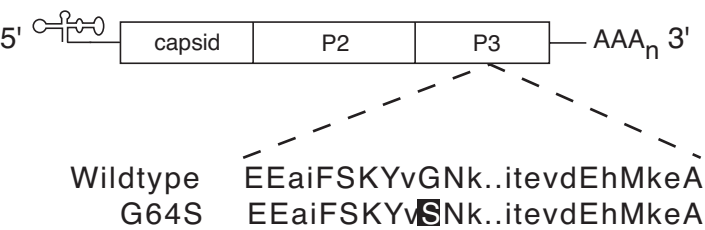

Supplement: 41586_2006_BFnature04388_MOESM5_ESM.pdf [file 41586_2006_BFnature04388_MOESM5_ESM.pdf]

a

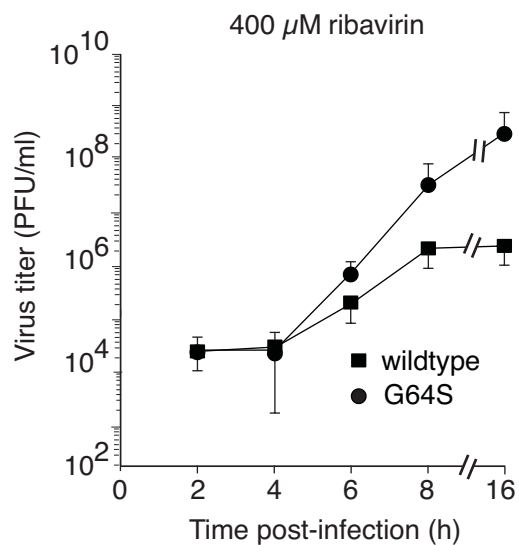

b

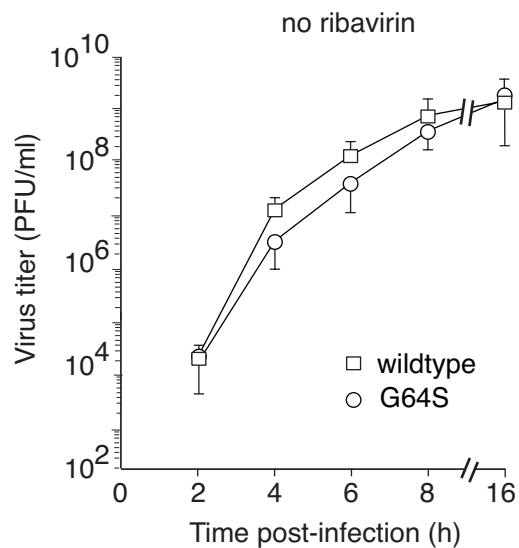

c

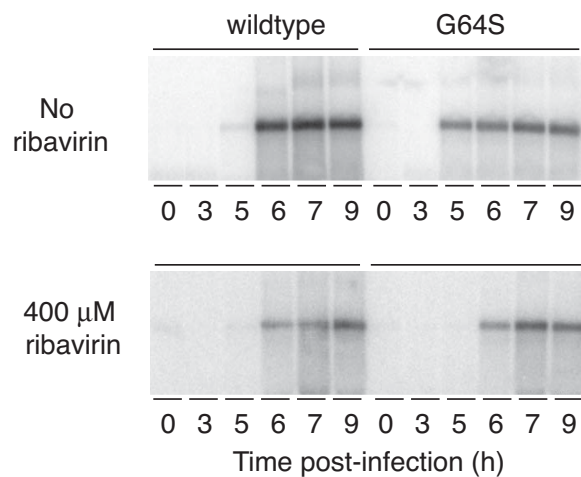

d

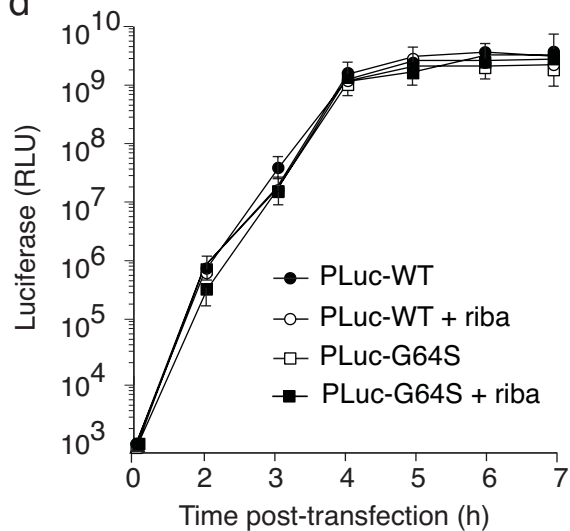

Supplement: 41586_2006_BFnature04388_MOESM6_ESM.pdf [file 41586_2006_BFnature04388_MOESM6_ESM.pdf]

**a**

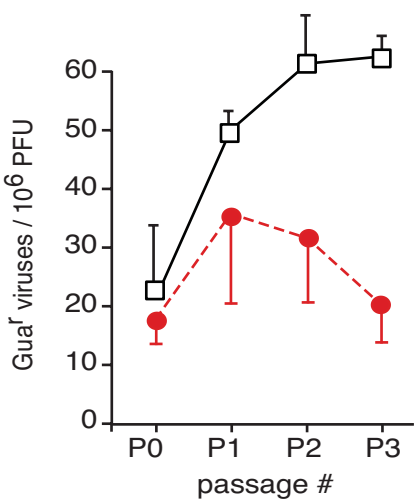

**b**

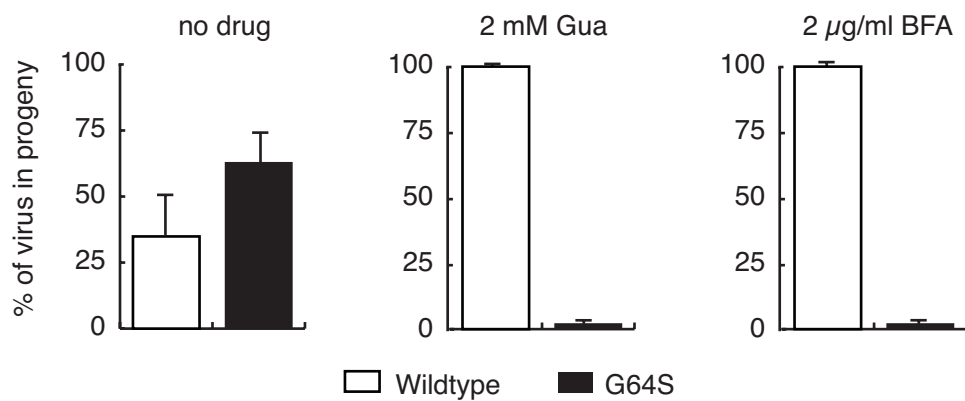

**c**

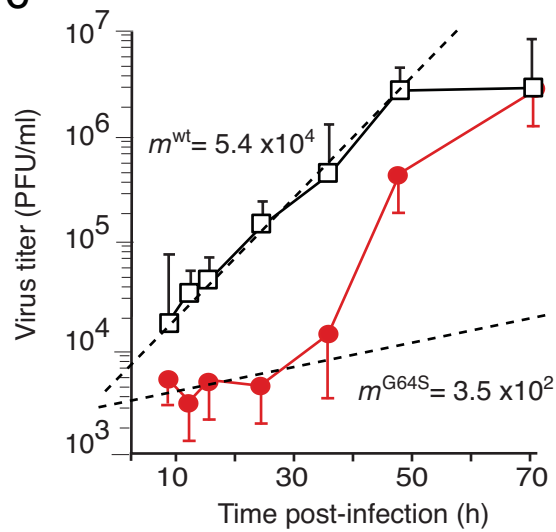

Supplement: 41586_2006_BFnature04388_MOESM7_ESM.pdf [file 41586_2006_BFnature04388_MOESM7_ESM.pdf]

a

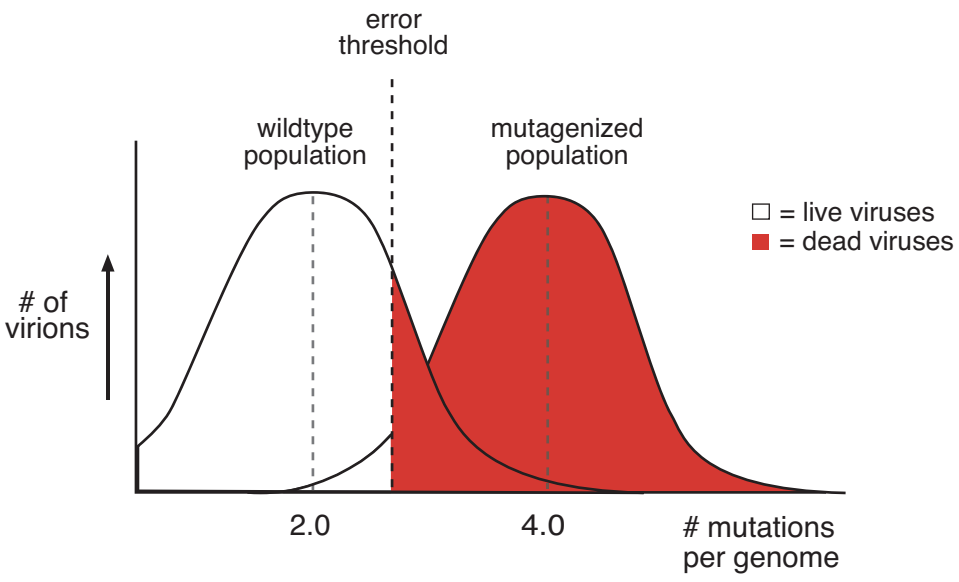

b

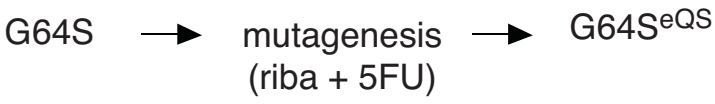

c

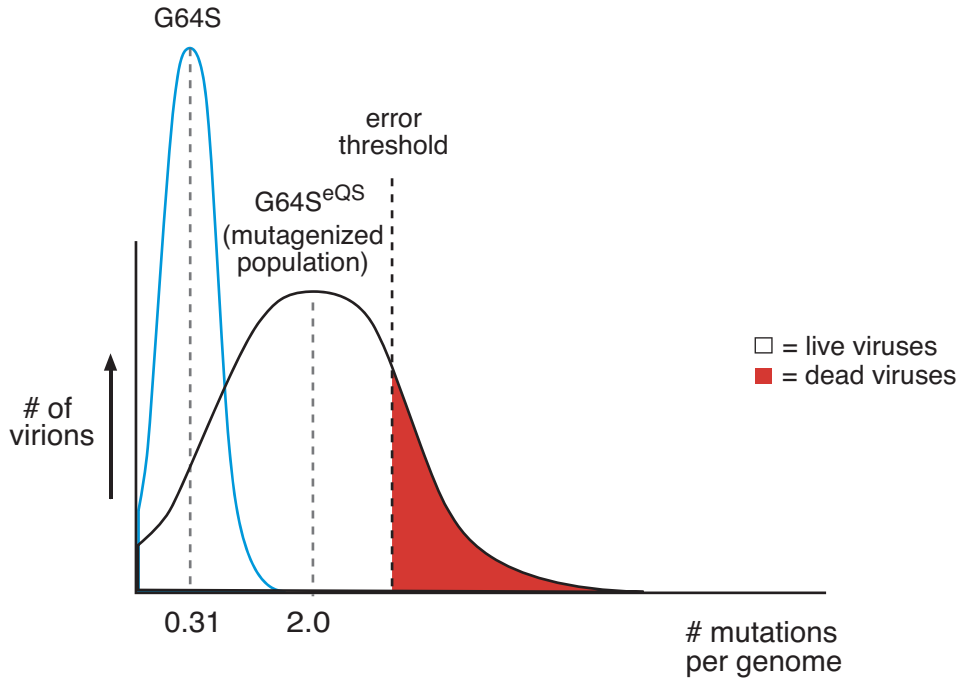

Supplement: 41586_2006_BFnature04388_MOESM8_ESM.pdf [file 41586_2006_BFnature04388_MOESM8_ESM.pdf]

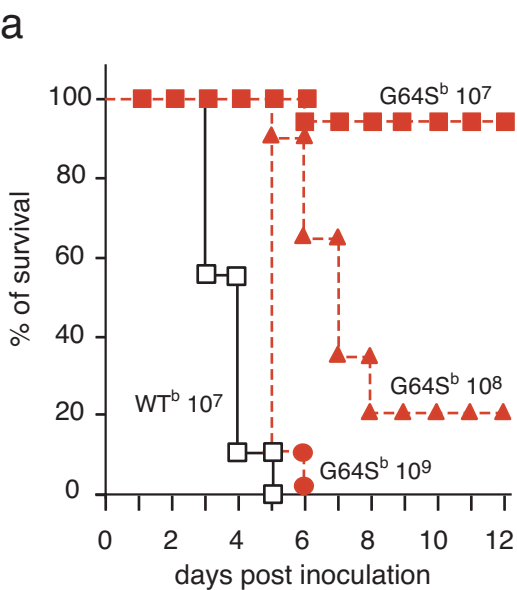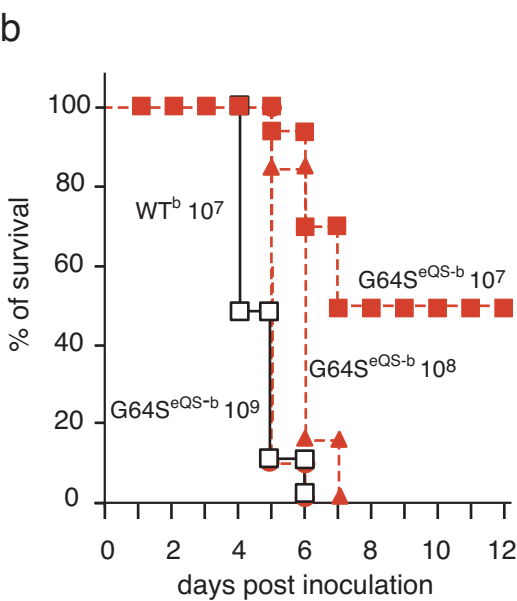

**c**

|                       | LD <sub>50</sub> (PFU) |
|-----------------------|------------------------|
| Wildtype <sup>b</sup> | $1.4 \times 10^6$      |
| G64S <sup>b</sup>     | $4.0 \times 10^7$      |
| G64S <sup>eQS-b</sup> | $1.2 \times 10^6$      |

Supplement: 41586_2006_BFnature04388_MOESM9_ESM.pdf [file 41586_2006_BFnature04388_MOESM9_ESM.pdf]
